# Supplementary material
Source: MDPI journal article supplement (https://www.mdpi.com/2073-445X/4/3/888)
Supplement: s1 [file s1]

#### S4: Kendall-Tau-b correlation

|     | Q1     | Q2     | Q3     | Q4     | Q5     | Q6     | Q7      | Q8     | Q9     | Q10    | Q11     | Q12     | Q13     | Q14     | Q15    | Q16     | Q17   | Q18     | Q19     | Q20     |
|-----|--------|--------|--------|--------|--------|--------|---------|--------|--------|--------|---------|---------|---------|---------|--------|---------|-------|---------|---------|---------|
| Q1  | 1      | ,483** | ,324** | ,395** | ,002   | ,379** | ,130    | ,230   | ,073   | ,201   | ,185    | ,208    | -,083   | ,037    | ,044   | ,067    | ,007  | ,063    | ,171    | ,050    |
| Q2  | ,483** | 1      | ,264   | ,273   | ,324** | ,236   | ,221    | ,257   | ,100   | ,150   | ,170    | ,199    | -,214*  | ,115    | ,062   | ,232    | ,003  | -,055   | ,194    | -,060   |
| Q3  | ,324** | ,264   | 1      | ,278   | ,067   | ,140   | ,069    | ,345** | ,200   | ,229   | ,176    | ,232*   | -,151   | ,079    | ,188   | ,233    | ,022  | -,165   | ,297**  | ,053    |
| Q4  | ,395** | ,273   | ,278   | 1      | ,565** | ,628** | ,168    | ,268   | ,273   | ,211   | ,074    | ,262*   | -,068   | ,260    | ,186   | ,257    | ,015  | ,006    | ,297**  | -,063   |
| Q5  | ,200   | ,324** | ,067   | ,565** | 1      | ,454** | ,234    | ,201   | ,247   | ,261   | ,111    | ,206    | ,084    | ,139    | ,093   | ,106    | ,148  | -,153   | ,131    | ,023    |
| Q6  | ,379** | ,236   | ,140   | ,628** | ,454** | 1      | ,125    | ,124   | ,179   | ,067   | ,004    | ,154    | -,011   | ,003    | ,013   | ,144    | -,032 | ,077    | ,189    | ,049    |
| Q7  | ,130   | ,221   | ,069   | ,168   | ,234   | ,125   | 1       | ,510** | ,276   | ,185   | -,056   | ,055    | ,087    | ,118    | ,147   | -,068   | ,101  | -,341** | ,231*   | ,029    |
| Q8  | ,230   | ,257   | ,345** | ,268   | ,201   | ,124   | ,510**  | 1      | ,210   | ,350** | ,046    | ,140    | 0,001   | -,790   | ,174   | ,107    | -,008 | -,177   | ,287**  | ,108    |
| Q9  | ,073   | ,100   | ,200   | ,273   | ,247   | ,179   | ,276    | ,210   | 1      | ,235   | ,092    | ,370**  | -,047   | ,126    | ,148   | ,086    | ,199  | -,208   | ,438**  | -,190   |
| Q10 | ,201   | ,150   | ,229   | ,211   | ,261   | ,067   | ,185    | ,350** | ,235   | 1      | ,444**  | ,415**  | -,047   | ,127    | -,012  | ,345    | ,079  | -,234   | ,329    | -,380   |
| Q11 | ,185   | ,170   | ,176   | ,074   | ,111   | ,004   | -,056   | ,046   | ,092   | ,444** | 1       | ,754**  | -,417** | ,240    | ,287   | ,378**  | ,046  | -,181   | ,346**  | -,291** |
| Q12 | ,208   | ,199   | ,232*  | ,262   | ,206   | ,154   | ,055    | ,140   | ,370** | ,415** | ,754**  | 1       | -,385** | ,264    | ,348** | ,420**  | ,082  | -,139   | ,416**  | -,285   |
| Q13 | -,083  | -,214* | -,151  | -,068  | ,084   | -,011  | ,087    | ,001   | -,047  | -,047  | -,417** | -,385** | 1       | -,327** | -,254  | -,406** | -,034 | ,158    | -,289** | ,410**  |
| Q14 | ,037   | ,115   | ,079   | ,260   | ,139   | ,003   | ,118    | -,079  | ,126   | ,127   | ,240    | ,264    | -,327** | 1       | ,415** | ,351**  | ,134  | -,176   | ,250    | -,377** |
| Q15 | ,044   | ,062   | ,188   | ,186   | ,093   | ,013   | ,147    | ,174   | ,148   | -,012  | ,287    | ,348**  | -,254   | ,415**  | 1      | ,370**  | ,030  | -,090   | ,205    | -,247   |
| Q16 | ,067   | ,232*  | ,233*  | ,257   | ,106   | ,144   | -,068   | ,107   | ,086   | ,345   | ,378**  | ,420**  | -,406** | ,351**  | ,370** | 1       | ,059  | ,008    | ,423**  | -,460** |
| Q17 | ,007   | ,003   | ,022   | ,015   | ,148   | -,032  | ,101    | -,008  | ,199   | ,079   | ,046    | ,082    | -,034   | ,134    | ,030   | ,059    | 1     | -,242   | ,100    | ,003    |
| Q18 | ,063   | -,055  | -,165  | ,006   | -,153  | ,077   | -,341** | -,177  | -,208  | -,234  | -,181   | -,139   | ,158    | -,176   | -,090  | ,008    | -,242 | 1       | -,197   | ,164    |
| Q19 | ,171   | ,194   | ,297** | ,297** | ,131   | ,189   | ,231    | ,287** | ,438** | ,329   | ,346**  | ,416**  | -,289** | ,250    | ,205   | ,423**  | ,100  | -,197   | 1       | -,324** |
| Q20 | ,050   | -,060  | ,053   | -,063  | ,023   | ,049   | ,029    | ,108   | -,019  | -,038  | -,291** | -,285   | ,410**  | -,377** | -,247  | -,460** | ,003  | ,164    | -,324** | 1       |

\*\* The correlation is significant at the level of 0, 01 (two-tailed).

\* The correlation is significant at the level of 0,05 (two-tailed).
