# Supplementary material
Source: MDPI journal article supplement (https://www.mdpi.com/2073-445X/4/3/888)
Supplement: s1 [file s1]

## **S1: Interview script**

In the field, questions were adapted according to each interviewee and some questions might have been left out or were added. A short introduction of the researcher and the aim of the research was explained prior to the interview.

1. First of all, what do you do for living?
2. (If not answered in 1.) Do you or your family have rice terraces? Or do you have relation to tourist activities, a business or someone of your family?

*Depending on the person's job, the interview starts with question 3. or 20. and continues with the rest later.*

First, I am interested in the change of the landscape and possible reasons for it.

3. Have you noticed a change in the landscape here in the region?  
- If yes, what kind of change?
4. Do you think that the state of the rice terraces has changed?  
- If yes, how did they change?
5. What do you think are the reasons for the degradation of the rice terraces?

*If interviewee does not know or after they told their reasons, it is asked for the different reasons in particular:*

6. How does the water supply of the terraces work, are there any problems?
7. Have you noticed that the climate has changed, if yes how?
8. Do you have problems with pests, if yes how?
9. Are there other environmental problems, if yes what kind?
10. How long can you supply your family with the yearly harvest?
11. Have you noticed that more terraces are abandoned, if yes why do you think that happened?
12. Do you think there is more migration towards the cities, if yes do you know why?
13. What do you think about the younger generation, do they still work in the fields?  
-If not, why?
14. Could you tell me a little bit about your family (children, siblings, parents, etc.) What do they do for living and where do they live? (This question can also be asked at the beginning after 1.)
15. Could you explain me something about the Ifugao culture and rituals?
16. Do you or your family still practice the rituals and traditions?  
- If yes could you explain me how?  
-If no, could you tell me why?
17. Do your children still know how to do the rituals or do they learn how to do the rituals?
18. Coming back to the degradation (if person believes it exists) what do you think are the implications of the degradation?

19. What do you think will be the future of the terraces?

Then, I am also interested in the influence of tourism.

20. Do you think that tourism in the region has changed and if yes, how? Have you noticed more or less tourists than in the past?

21. Could you tell me where the tourists are from?

22. What do you think are the impacts of tourism for your family, the village and the region?

23. (Depending on how they answer or if they do not understand) Do you think that tourism is rather good or bad for your family/village/region? Could you also think of some negative/positive impacts?

24. What impact do you think have the terraces on tourism?
