# Supplementary material
Source: MDPI journal article supplement (https://www.mdpi.com/2073-445X/4/3/888)
Supplement: s1 [file s1]

Archive with 4 entries (4 files):
- S3. comparison of the mode according to different categories.pdf
- S1 interview script.pdf
- S2 Questionnaire.pdf
- S4 correlation test.pdf
