# Supplementary material
Source: MDPI journal article supplement (https://www.mdpi.com/2073-445X/4/3/888)
Supplement: s1 [file s1 › S2 Questionnaire.pdf]

## S2: Questionnaire: Causes and implications of changes in agricultural landscape

Thank you for taking the time to complete this survey which is part of the LEGATO project aiming to advance long-term sustainable development of irrigated rice fields. All the information obtained in this survey will be used for scientific purposes only. The information will not be used for commercial purposes and no personal information will be disclosed. The aim of this survey is to get information about your view on the causes and implications of the degradation of the rice terraces in your region.

Approximate duration of the survey: ~ 5–10 minutes

Name: \_\_\_\_\_ Date: \_\_\_\_\_<sup>1</sup>

According to the UNESCO there are estimations that up to 30 percent of the rice terraces have been abandoned and left to erode. As a result, the Rice Terraces of the Philippine Cordilleras was added to the List of World Heritage Sites in Danger in 2001.

Q1. To what extent do you agree with the following statements? Please use the following table to indicate if you strongly agree, agree, are undecided, disagree or strongly disagree with each statement.

Q1.1. The degradation of rice terraces [in the community] has been increasing because...

| Statement                                                                                                                       | Strongly agree           | agree                    | undecided                | disagree                 | Strongly disagree        |
|---------------------------------------------------------------------------------------------------------------------------------|--------------------------|--------------------------|--------------------------|--------------------------|--------------------------|
| ... More and more farmers have been abandoning the fields to work in the tourism sector.                                        | <input type="checkbox"/> |
| ... The agricultural work is no longer profitable and does not offer conditions for sustained livelihoods.                      | <input type="checkbox"/> |
| ... There has been more and more migration towards other cities outside the region.                                             | <input type="checkbox"/> |
| ... The young generation that has higher education levels does not want to work in agriculture anymore.                         | <input type="checkbox"/> |
| ... The young generation does not have the same skills to cultivate the terraces than the older generations.                    | <input type="checkbox"/> |
| ... The young generation does not want to work in agriculture anymore because other work has a higher status and is better seen | <input type="checkbox"/> |
| ... There is not enough water due to irrigation or due to other problems                                                        | <input type="checkbox"/> |
| ... the climate has been changing and does not provide optimal conditions to sustain the terraces anymore                       | <input type="checkbox"/> |
| ... because the soil has been losing its fertility                                                                              | <input type="checkbox"/> |
| ... because of landslides destroying the terraces                                                                               | <input type="checkbox"/> |

Q1.2. If the degradation of rice terraces [in the community] increases in the next 10 years...

| Statement                                                                                                          | Strongly agree           | agree                    | undecided                | disagree                 | Strongly disagree        |
|--------------------------------------------------------------------------------------------------------------------|--------------------------|--------------------------|--------------------------|--------------------------|--------------------------|
| ... The number of visitors will decline                                                                            | <input type="checkbox"/> |
| ... The income from visitors will decline                                                                          | <input type="checkbox"/> |
| ... Visitors will be more satisfied with their visit                                                               | <input type="checkbox"/> |
| ... The overall quality of the recreational experience will decline                                                | <input type="checkbox"/> |
| ... The crop production of the communities will be threatened                                                      | <input type="checkbox"/> |
| ... The landscape scenery of the region will be less beautiful                                                     | <input type="checkbox"/> |
| ... Spiritual values will get more and more lost                                                                   | <input type="checkbox"/> |
| ... The practice of rituals will not decrease, but maintained                                                      | <input type="checkbox"/> |
| ... The number of people who have traditional agricultural knowledge will decrease                                 | <input type="checkbox"/> |
| ... The current trends in the tourism activities will remain the same. It does not depend on the state of terraces | <input type="checkbox"/> |

Thank you very much for taking your time to fill out this survey.

Personal data of the surveyees (location, age, sex and occupation) was collected separately in the interview step.
